# Supplementary material
Source: PubMed Central journal article supplement (PMC7183857)
Supplement: NIHMS1571235-supplement-Supplemental_Information.pdf [file NIHMS1571235-supplement-Supplemental_Information.pdf]

**Structure, Volume 27**

**Supplemental Information**

**MxB Restricts HIV-1 by Targeting  
the Tri-hexamer Interface of the Viral Capsid**

**Sarah Sierra Smaga, Chaoyi Xu, Brady James Summers, Katherine Marie  
Digianantonio, Juan R. Perilla, and Yong Xiong**

**Figure S1. Full pelleting assay with controls and MxB salt-dependence. Related to Figure 1.**  
 Full gels in triplicate for pelleting assays in Figure 1C and Figure 1D (used for quantification in Figure 1E).

**Full gels: Figure 1C**

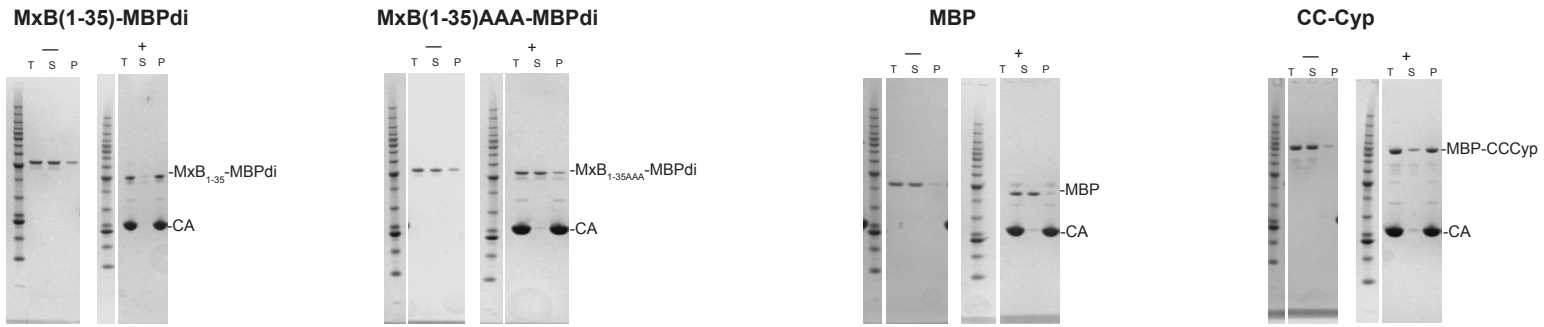

**Full gels: Figure 1D and E**

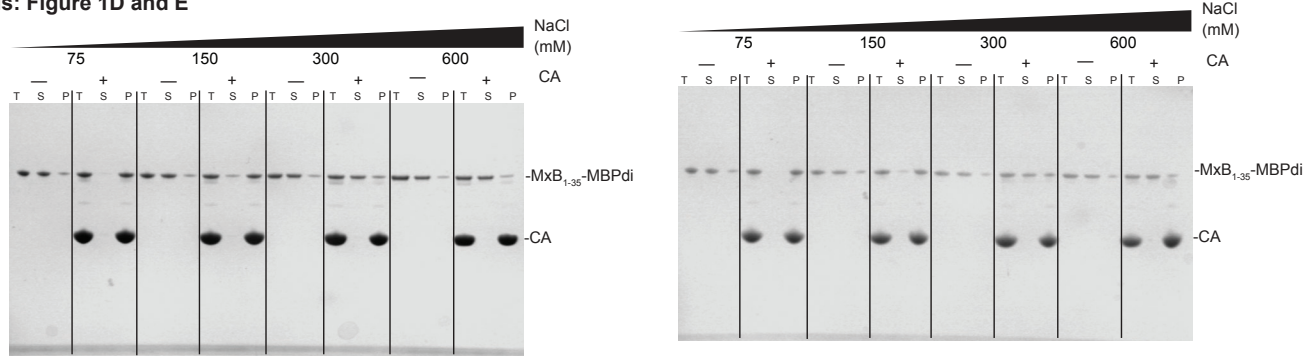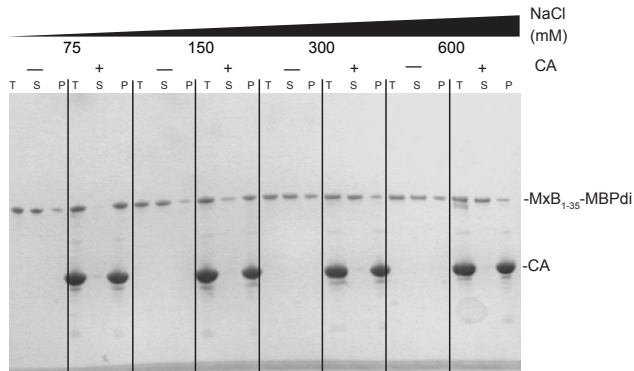

## Figure S2. Mapping the MxB binding site using CA mutations. Related to Figure 2.

A. Electron micrographs of CA tubes used in Figure 2 copelleting assays;

B. Full gels in triplicate of MxB copelleting assays performed in Figure 2

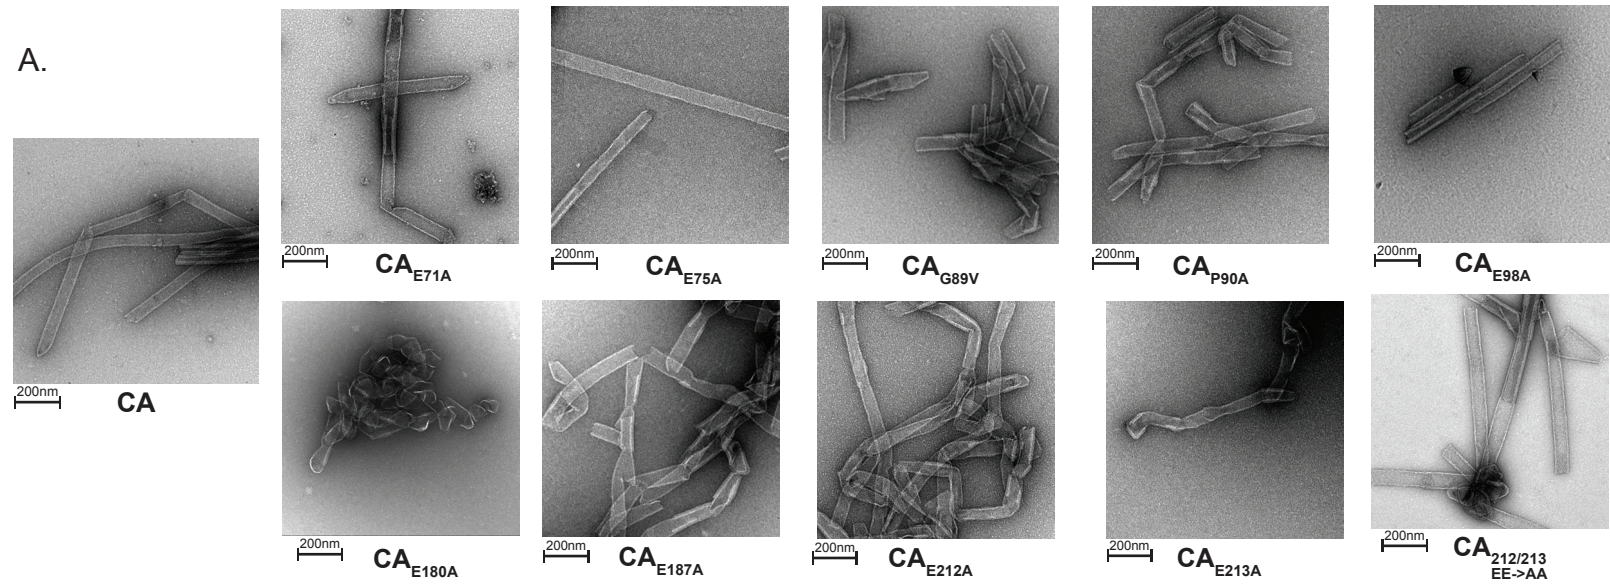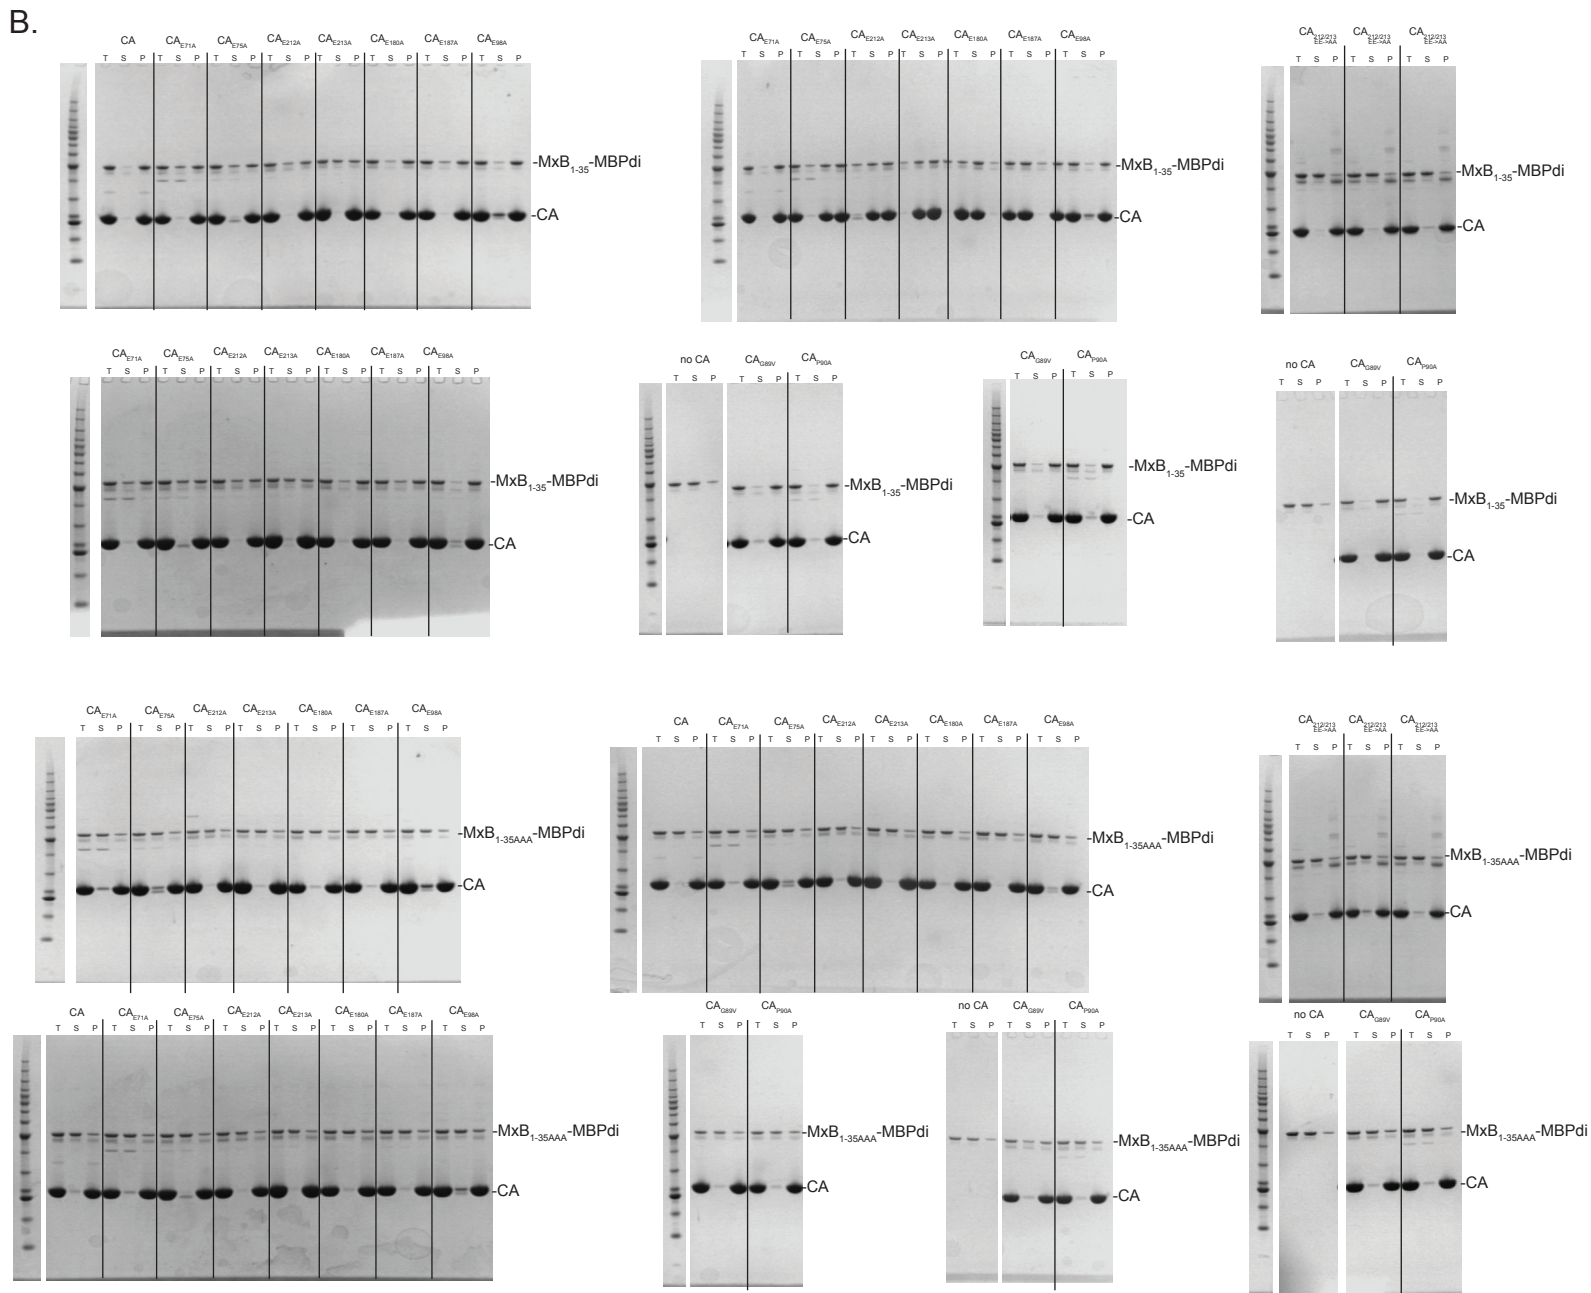

# Figure S3. Mapping the MxB binding site, positive and negative controls. Related to Figure 2.

A. Full gels in triplicate of MBP and CCCyP copelleting assays performed in Figure 2

B. Quantification of MBP and CCCyP controls

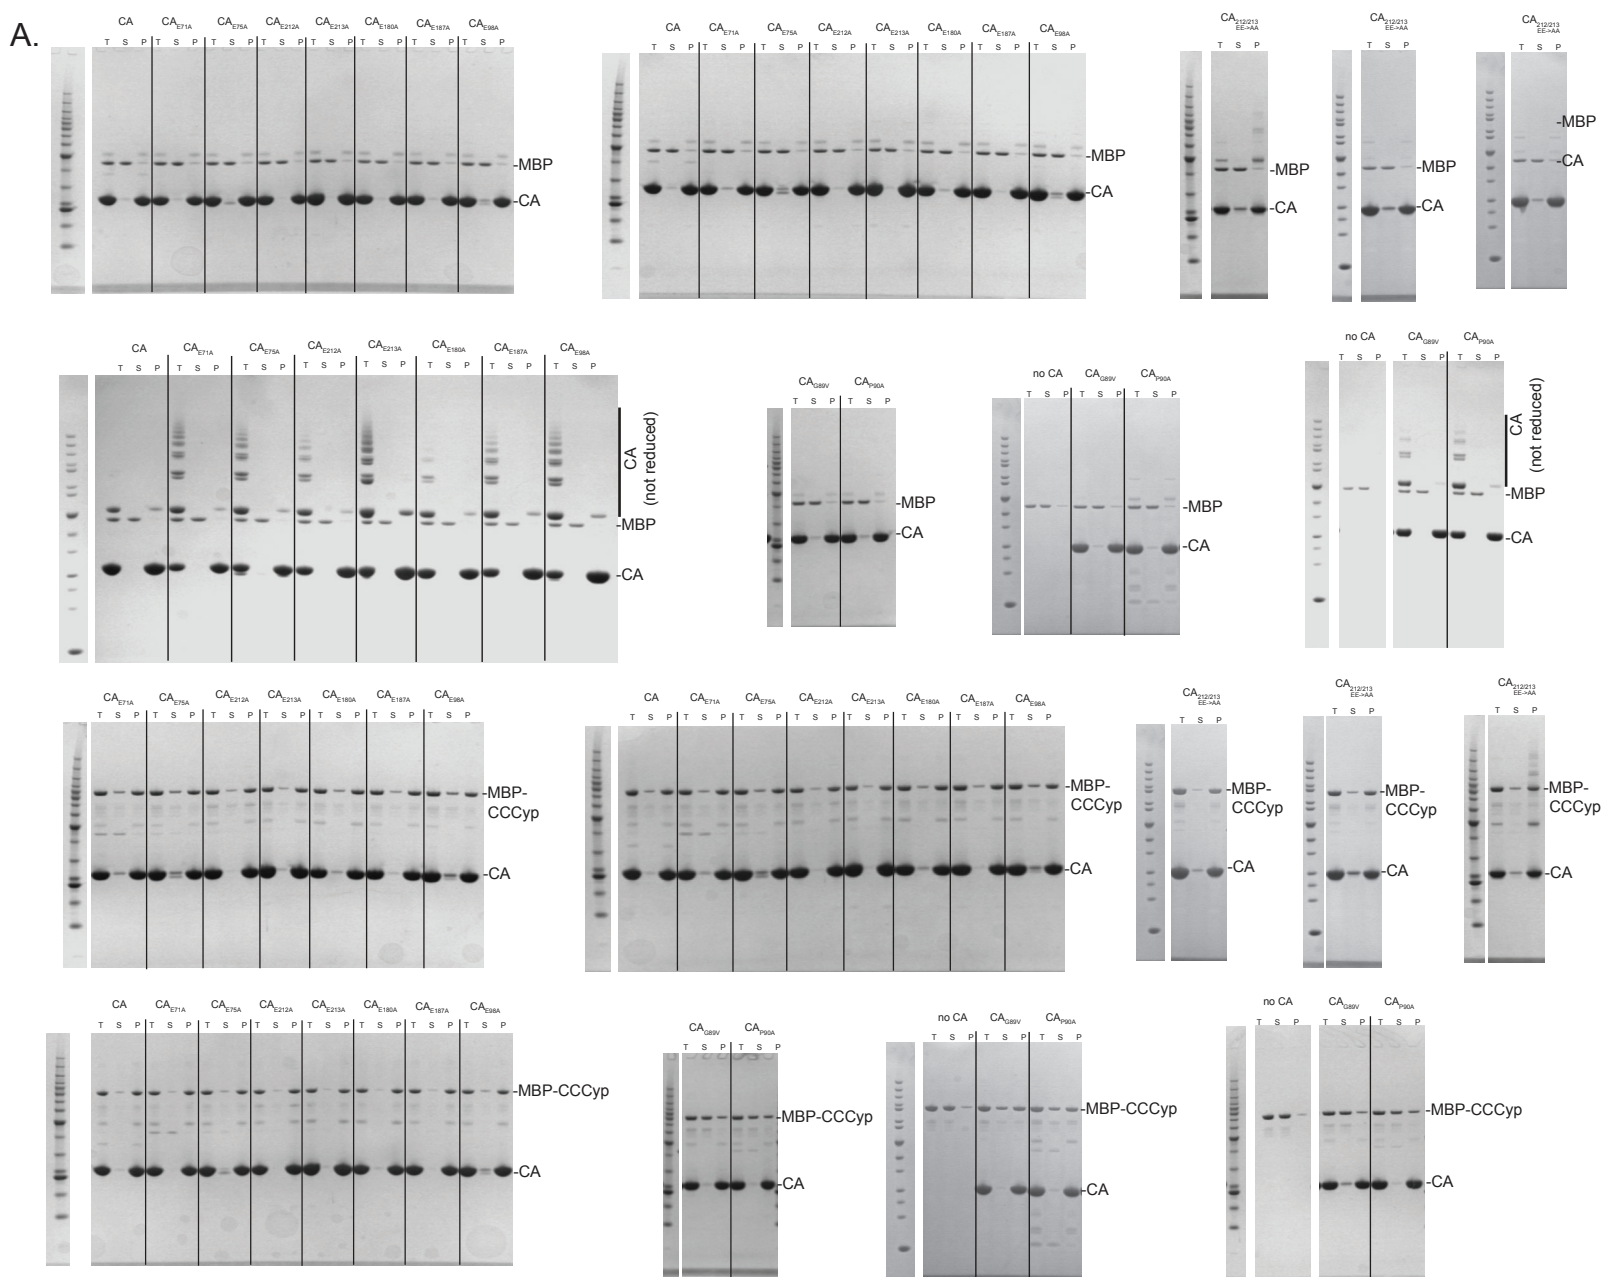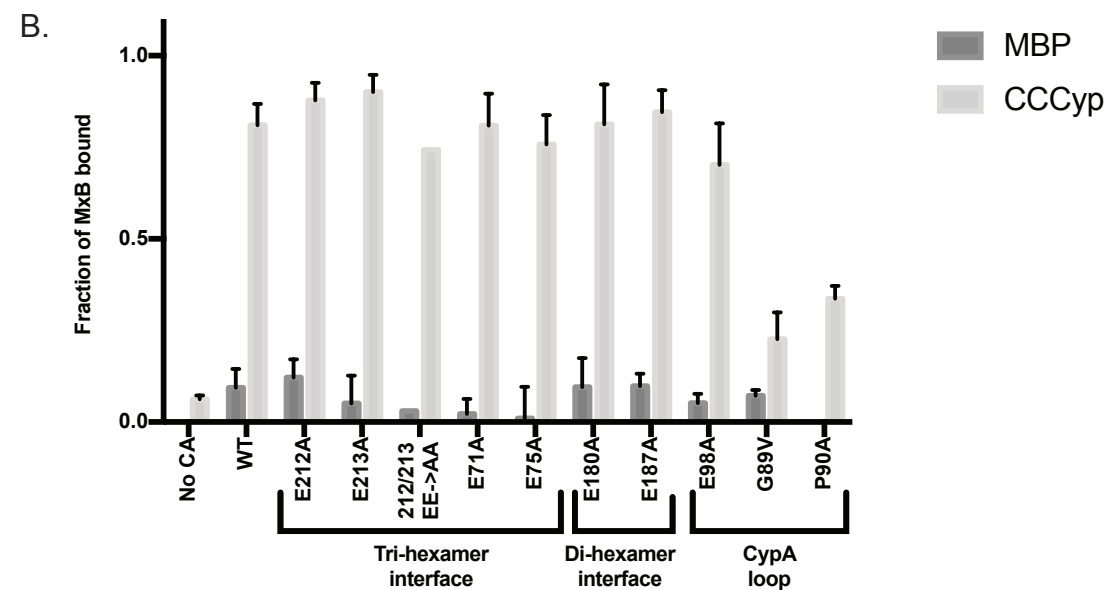

**Figure S4. Testing CA mutations that escape MxB restriction. Related to Figure 3.**

A. Electron micrographs of CA tubes used in Figure 3 (WT CA shown in Figure S2); B. Full gels in triplicate of copelleting assays performed in Figure 3; C. quantification of MBP and CCCyP controls

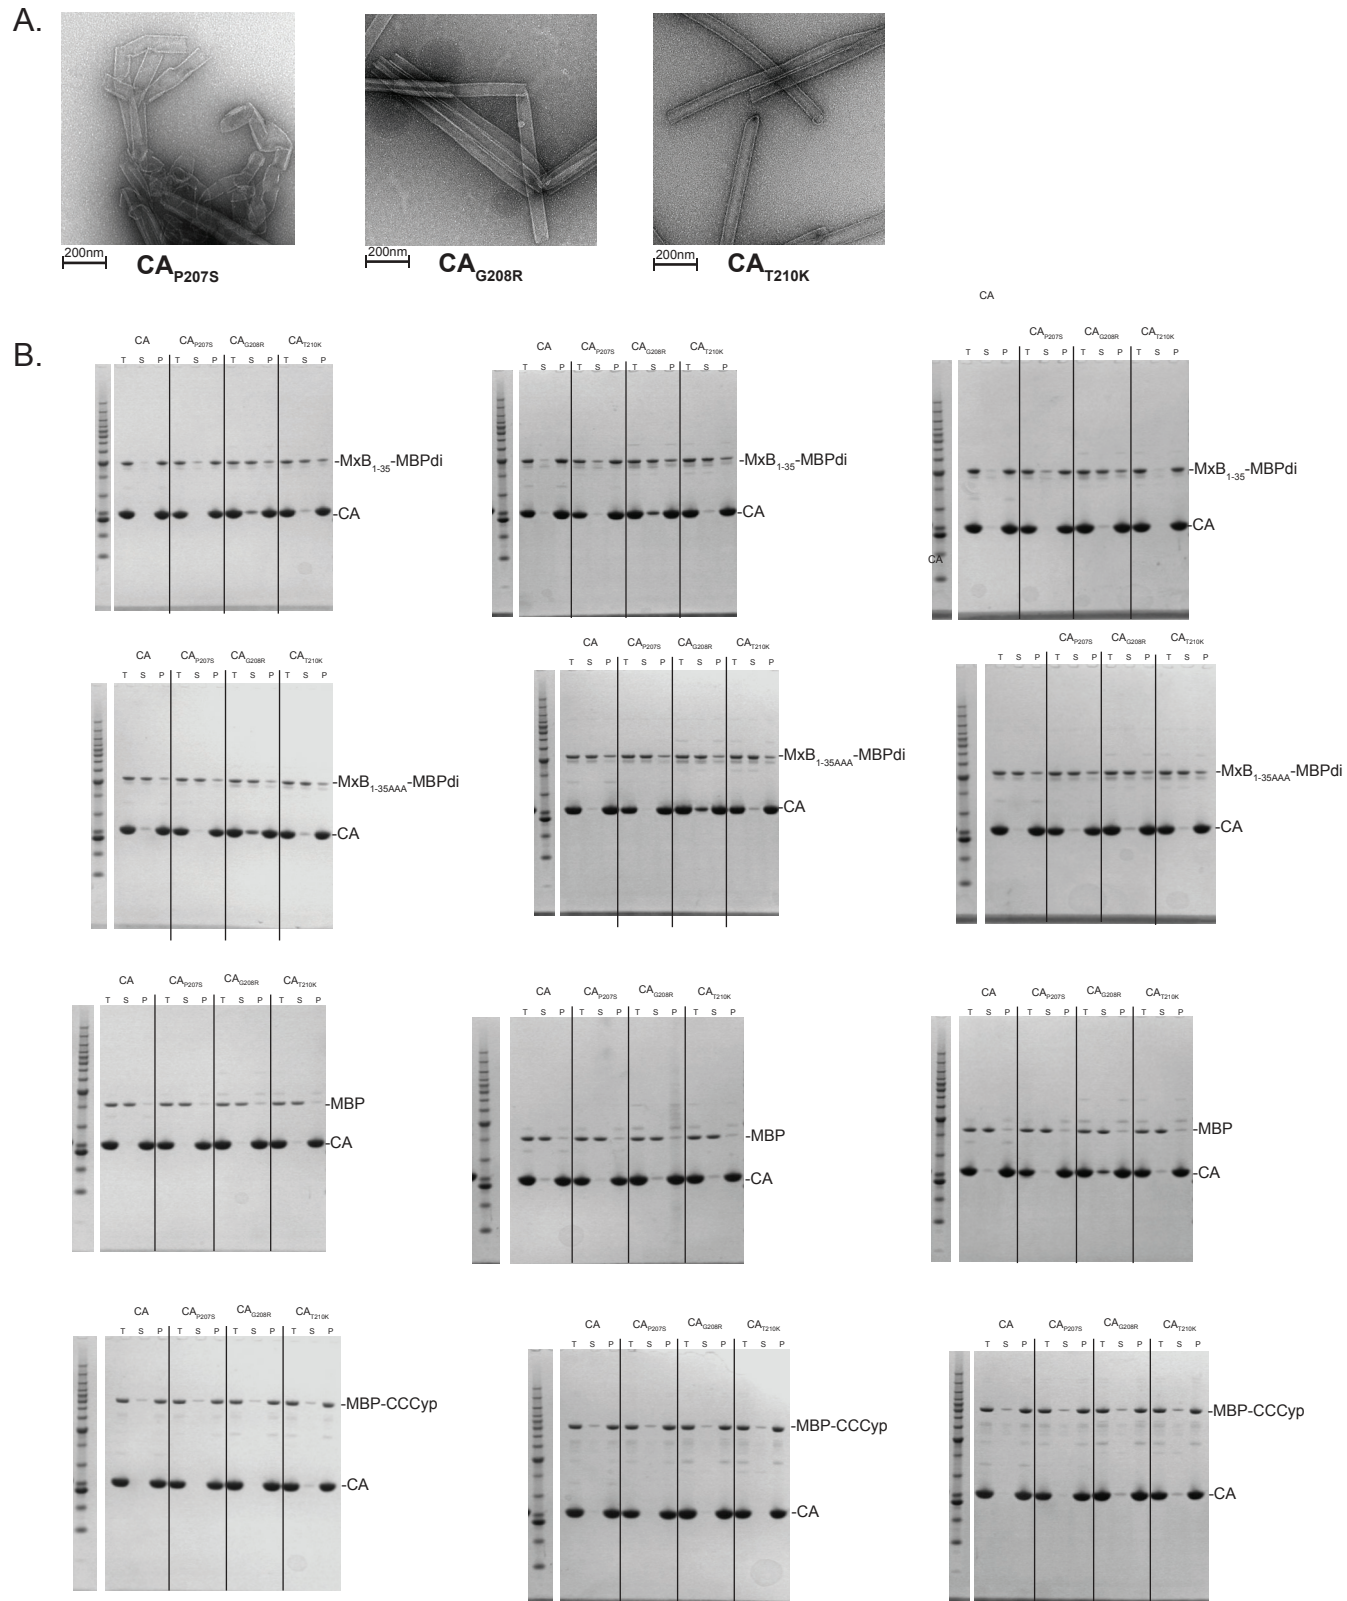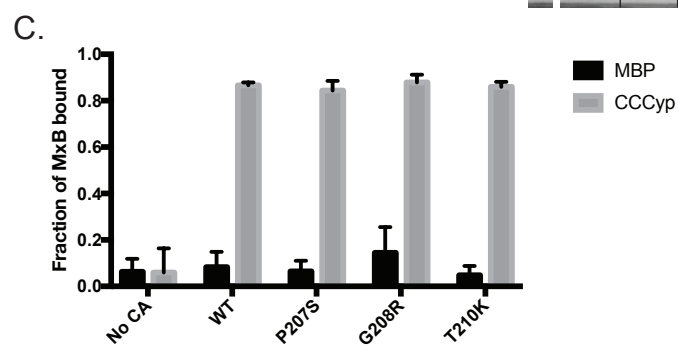

**Figure S5. Molecular dynamics of the MxB-CA interaction. Related to Figure 4.**

A. Molecular contact figures between MxB residues, K6 (left), W8 (middle), and Y10 (right), and CA residues.

B. The ion occupancies of sodium calculated from the MD trajectory;

C. Ion occupancies of chloride calculated from the MD trajectory.

D. Contact analysis during the 15 $\mu$ s simulation of MxB and the di-hexamer and tri-hexamer interface.

A.

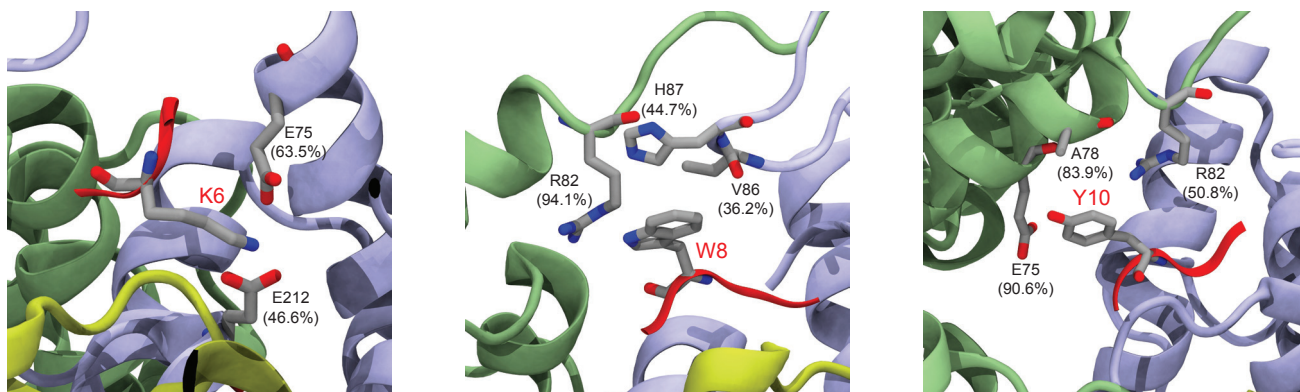

B.

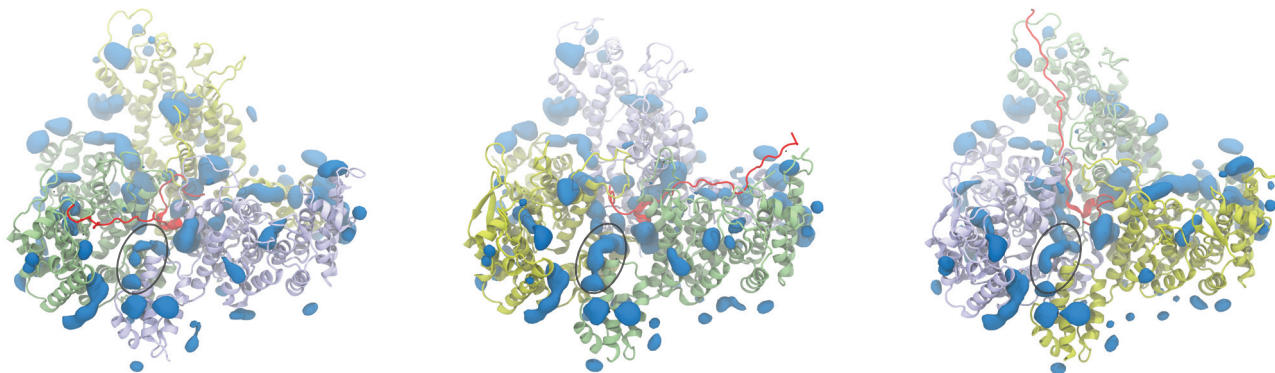

C.

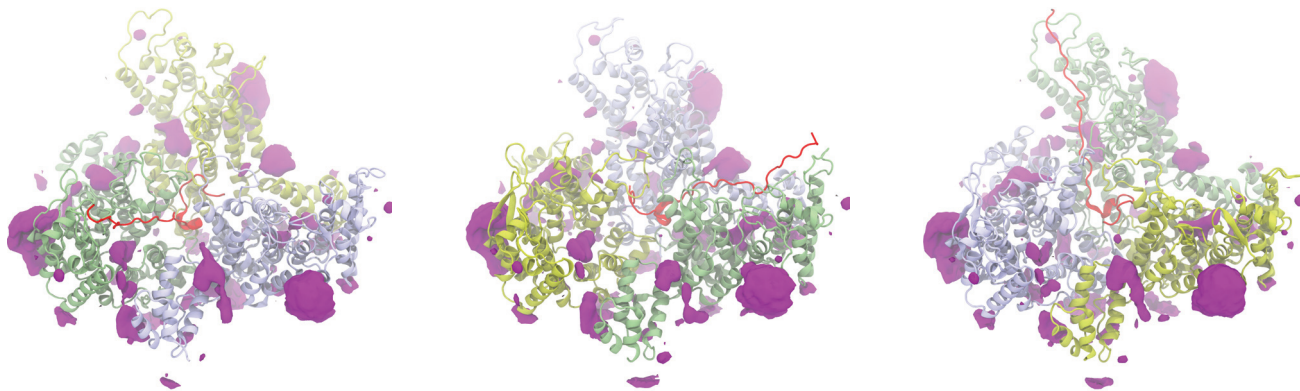

D.

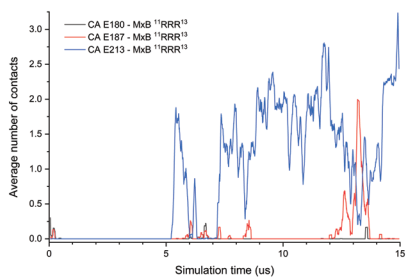

**Table S1: Primers used to generate CA mutations, related to STAR Methods**

| REAGENT or RESOURCE                                                       | SOURCE                    | IDENTIFIER |
|---------------------------------------------------------------------------|---------------------------|------------|
| Primer: CA E71A. FWD<br>AGCTTCCTCATTGATGGTCGCTTTTAAACATTTGCATGGC          | IDT/This paper            | N/A        |
| Primer: CA E71A REV<br>GCCATGCAAATGTTAAAAGCGACCATCAATGAGGAAGCT            | IDT/This paper            | N/A        |
| Primer: CA E75A FWD<br>AAAAGAGACCATCAATGCGGAAGCTGCAGAATGGG                | IDT/This paper            | N/A        |
| Primer: CA E75A REV<br>CCCATTCTGCAGCTTCCGCATTGATGGTCTCT                   | IDT/This paper            | N/A        |
| Primer: CA G89V FWD<br>CATCCAGTGCATGCAGTGCCTATTGCACCAGG                   | IDT/Laboratory collection | N/A        |
| Primer: CA G89V REV<br>CCTGGTGC AATAGGCACTGCATGCACTGGATG                  | IDT/Laboratory collection | N/A        |
| Primer: CA P90A FWD<br>CATCCAGTGCATGCAGGGGCAATTGCACCAGGCCAGATG            | IDT/Laboratory collection | N/A        |
| Primer: CA P90A REV<br>CATCTGGCCTGGTGC AATTGCCCTGCATGCACTGGATG            | IDT/Laboratory collection | N/A        |
| Primer: CA E98A FWD<br>CAGATGAGAGCACCAAGGGGAAGTGACA                       | IDT/This paper            | N/A        |
| Primer: CA E98A REV<br>TCACTTCCCCTTGGTGCTCTCATCTGGC                       | IDT/This paper            | N/A        |
| Primer: CA E180A FWD<br>GAGCCGAGCAAGCTTCACAAGCGGTAAAAAATTGGATGACAGA       | IDT/This paper            | N/A        |
| Primer: CA E180A REV<br>TCTGTCATCCAATTTTTTACCGCTTGTGAAGCTTGCTCGGCTC       | IDT/This paper            | N/A        |
| Primer: CA E187A FWD<br>GAGGTAAAAAATTGGATGACAGCAACCTTGTTGGTCCAAAATGCG     | IDT/This paper            | N/A        |
| Primer: CA E187A REV<br>CGCATTGTTGACCAACAAGGTTGCTGTCATCCAATTTTTTACCTC     | IDT/This paper            | N/A        |
| Primer: CA E212A FWD<br>ACCAGGAGCGACACTAGCAGAAATGATGACAGCAT               | IDT/This paper            | N/A        |
| Primer: CA E212A REV<br>ATGCTGTCATCATTCTGCTAGTGTGCTCGCTCCTGGT             | IDT/This paper            | N/A        |
| Primer: CA E213A FWD<br>AGGAGCGACACTAGAAGCAATGATGACAGCATGTC               | IDT/This paper            | N/A        |
| Primer: CA E213A REV<br>GACATGCTGTCATCATTGCTTCTAGTGTGCTCGCTCCT            | IDT/This paper            | N/A        |
| Primer: CA EE212/213AA FWD<br>GACCAGGAGCGACACTAGCAGCAATGATGACAGCATGTCA    | IDT/This paper            | N/A        |
| Primer: CA EE212/213AA REV<br>TGACATGCTGTCATCATTGCTGCTAGTGTGCTCGCTCCTGGTC | IDT/This paper            | N/A        |
| Primer: CA P207S FWD<br>CTATTTTAAAAGCATTGGGAAGCGGAGCGACACTAGAAGAAATG      | IDT/This paper            | N/A        |
| Primer: CA P207S REV<br>CATTCTTCTAGTGTGCTCGCTCCGCTTCCCAATGCTTTTAAAATAG    | IDT/This paper            | N/A        |
| Primer: CA G208R FWD<br>GCATTGGGACCACGTGCGACACTAGAAG                      | IDT/This paper            | N/A        |
| Primer: CA G208R REV<br>CTTCTAGTGTGCTCGACGTGGTCCCAATGC                    | IDT/This paper            | N/A        |
| Primer: CA T210K FWD<br>GCATTGGGACCAGGAGCGAAACTAGAAGAAATGATGAC            | IDT/This paper            | N/A        |
| Primer: CA T210K REV<br>GTCATCATTCTTCTAGTTTCGCTCCTGGTCCCAATGC             | IDT/This paper            | N/A        |
